# Supplementary material for: Antioxidant Compounds from Microalgae: A Review
Source: MDPI journal article supplement (doi:10.3390/md19100549), 2021-09-28
Supplement: s1 [file s1]

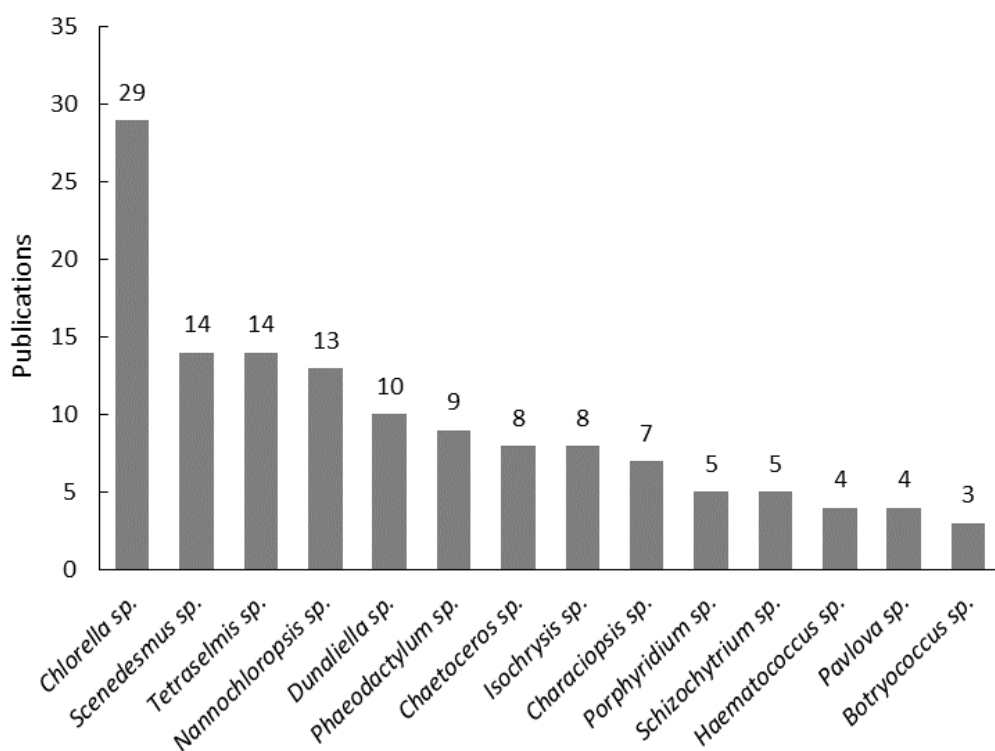

**Figure S1. Top 15 microalgae genus studied for their antioxidant activity**

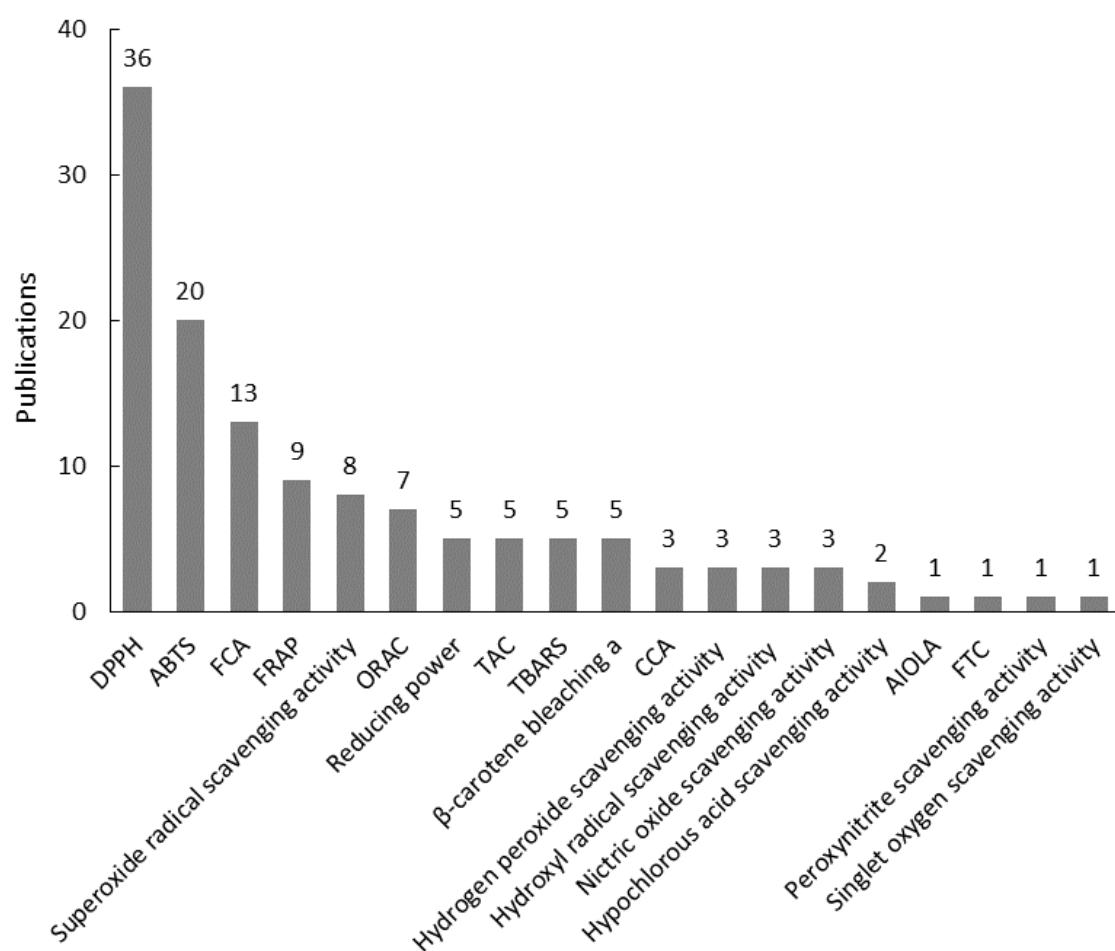

**Figure S2. In vitro chemical assays used to evaluate the antioxidant activity of microalgae crude extracts**
